# Supplementary material for: Molecular profiling of long‐term responders to immune checkpoint inhibitors in advanced non‐small cell lung cancer
Source: PubMed Central journal article supplement (PMC8024716; doi:10.1002/1878-0261.12891), 2021-01-06

Figure S1

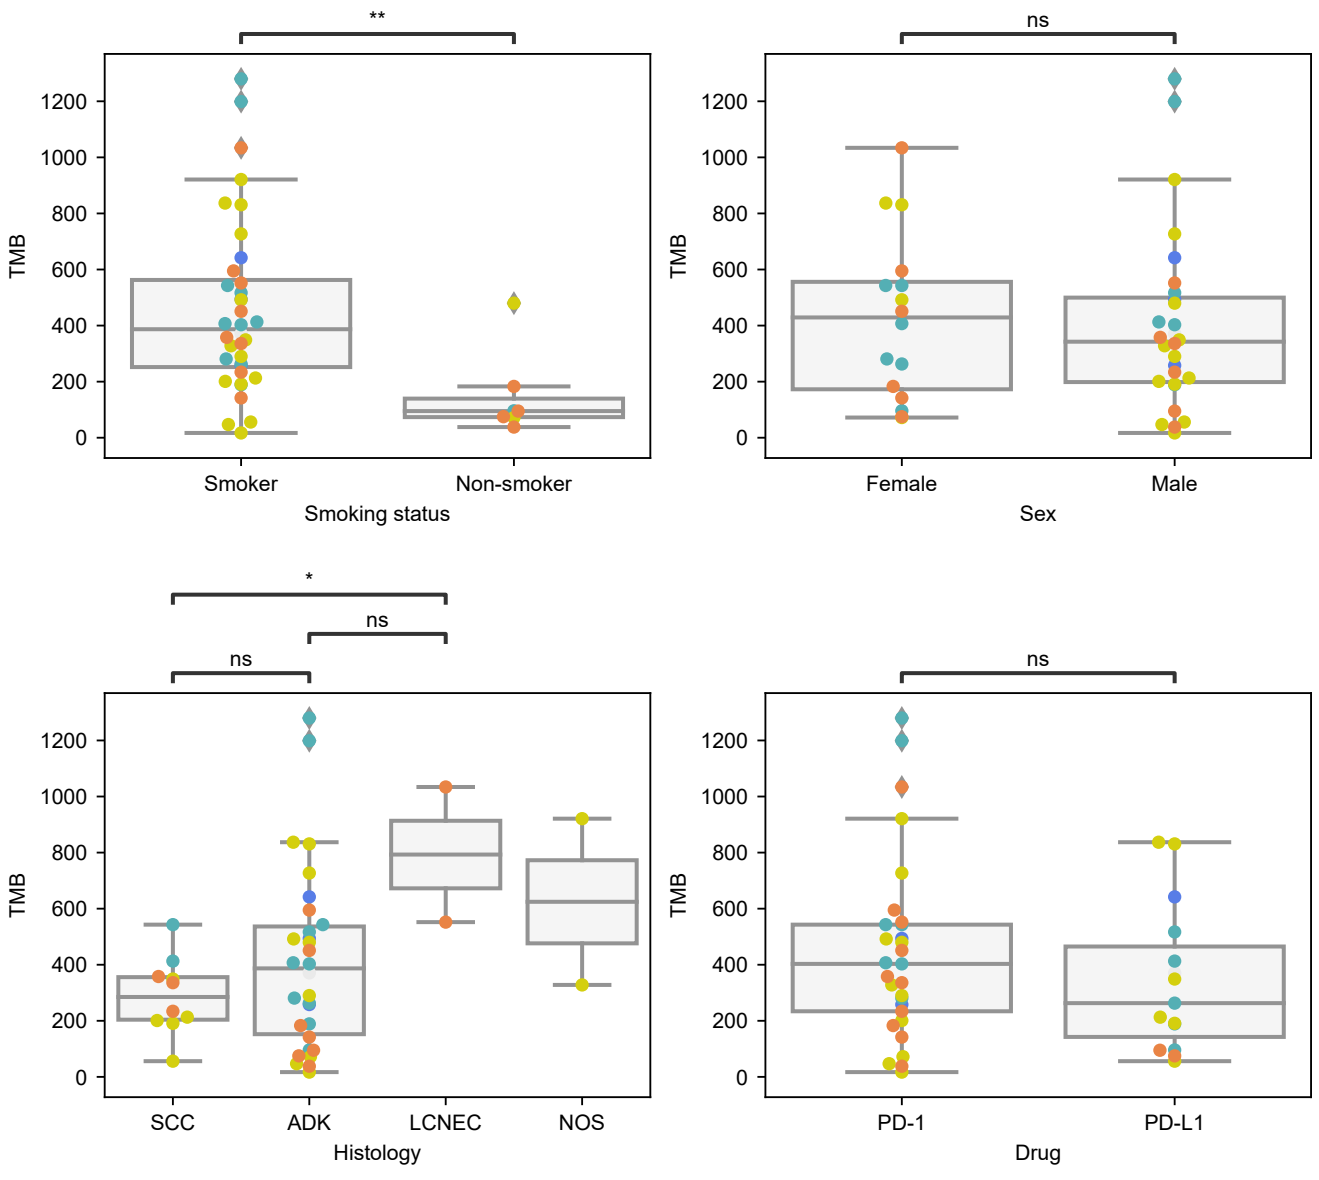

Figure S2

A

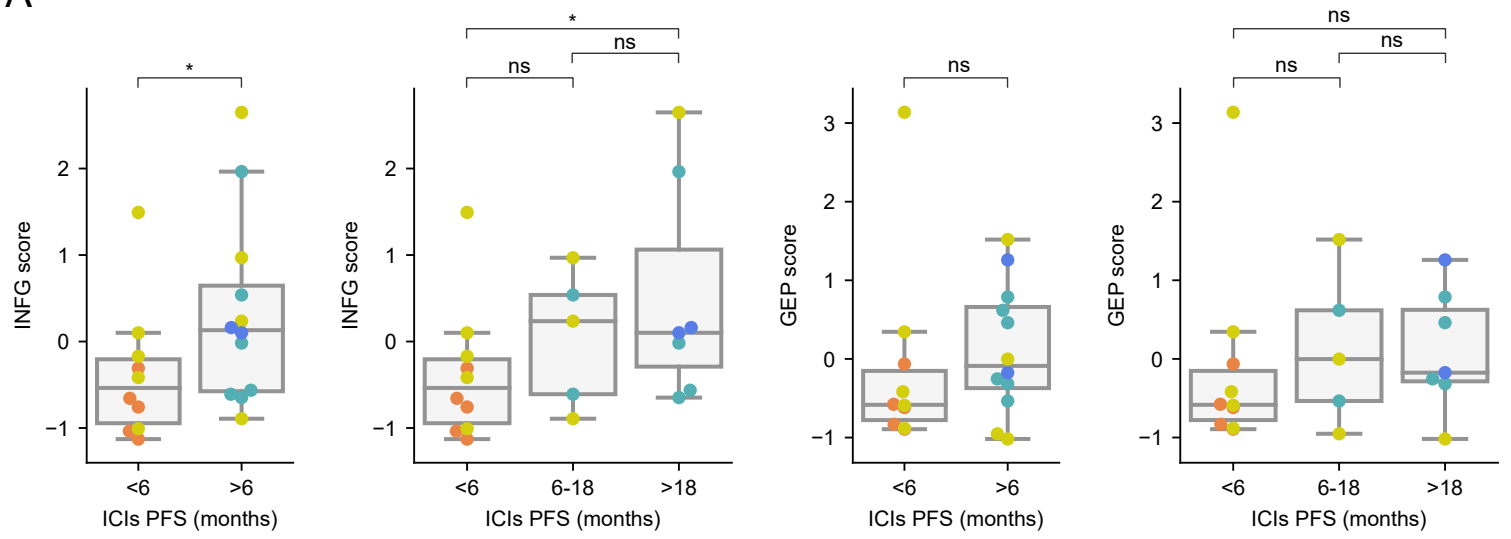

B

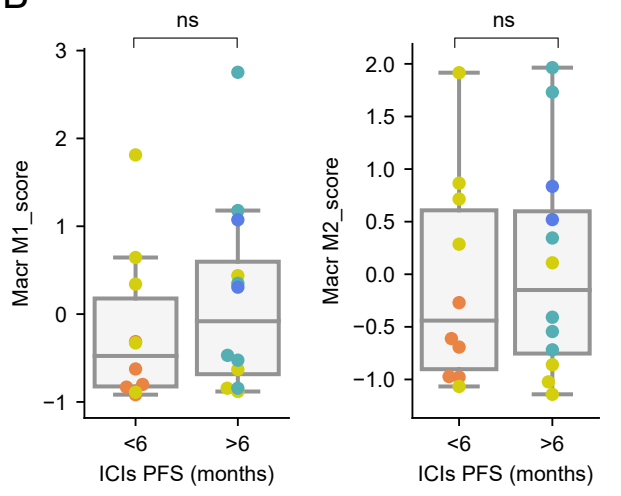

C

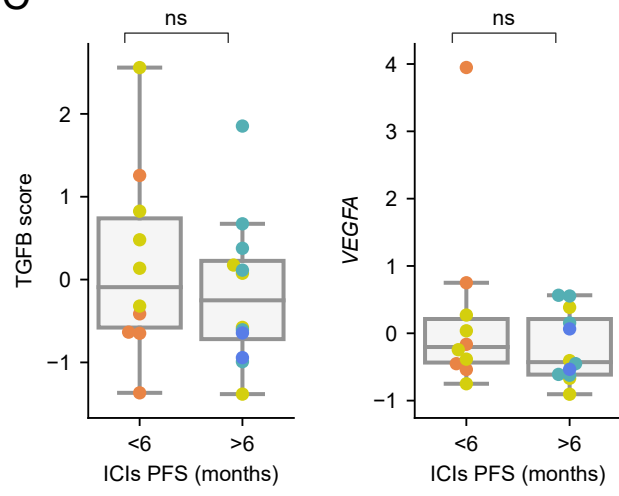

D

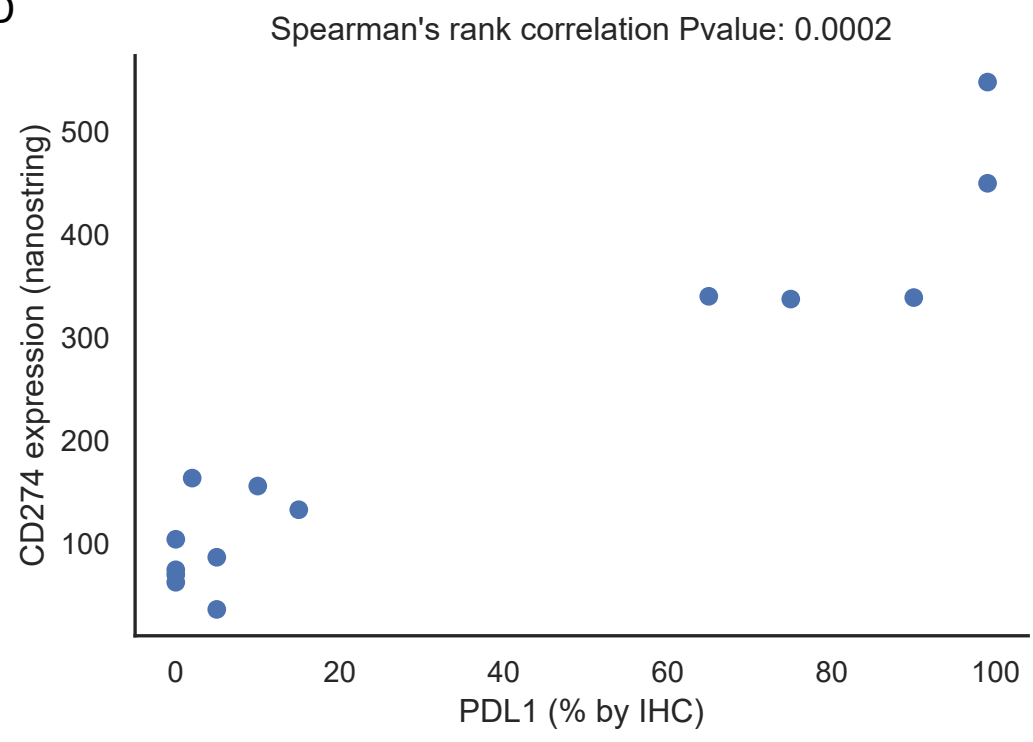

Figure S3

A

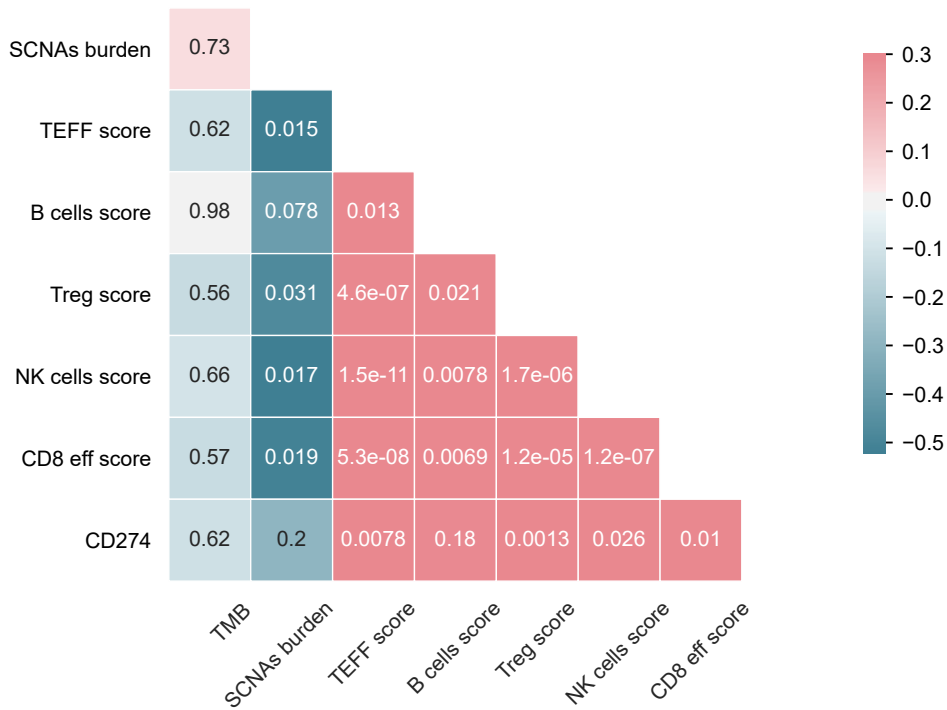

B

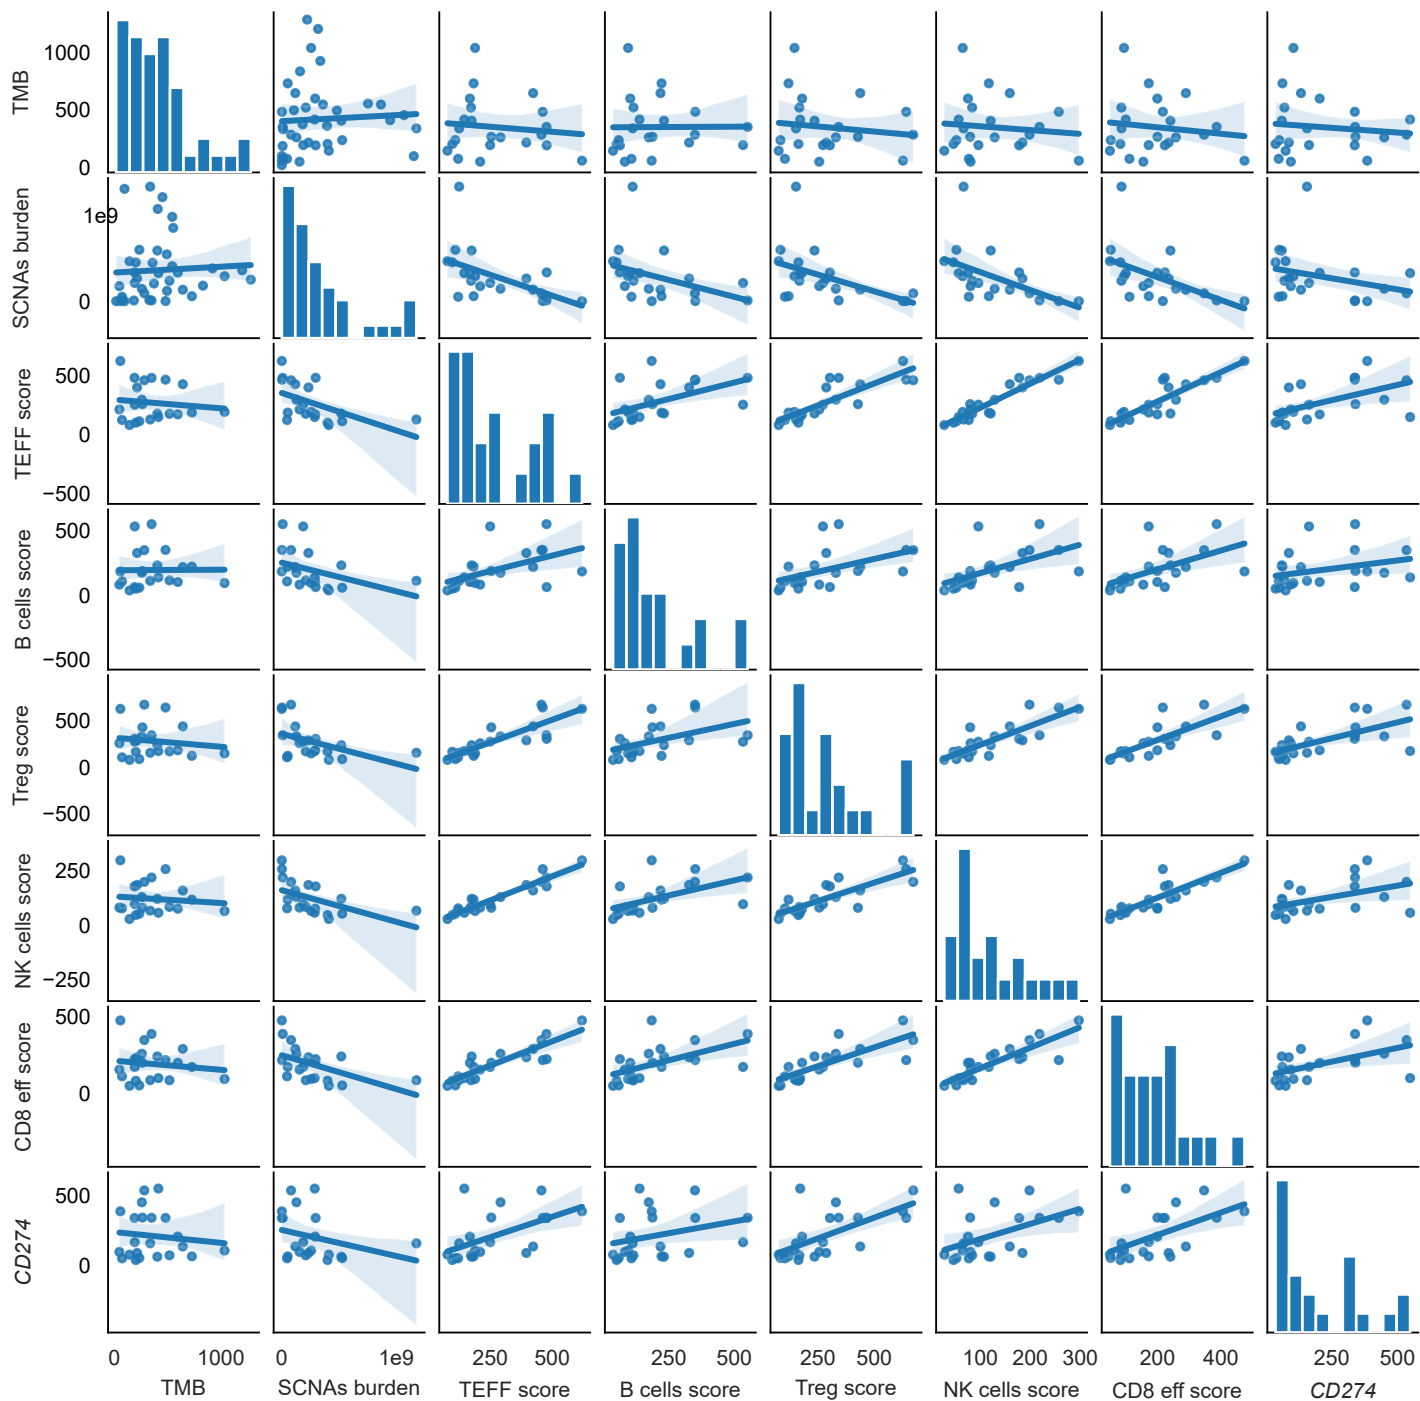

Figure S4

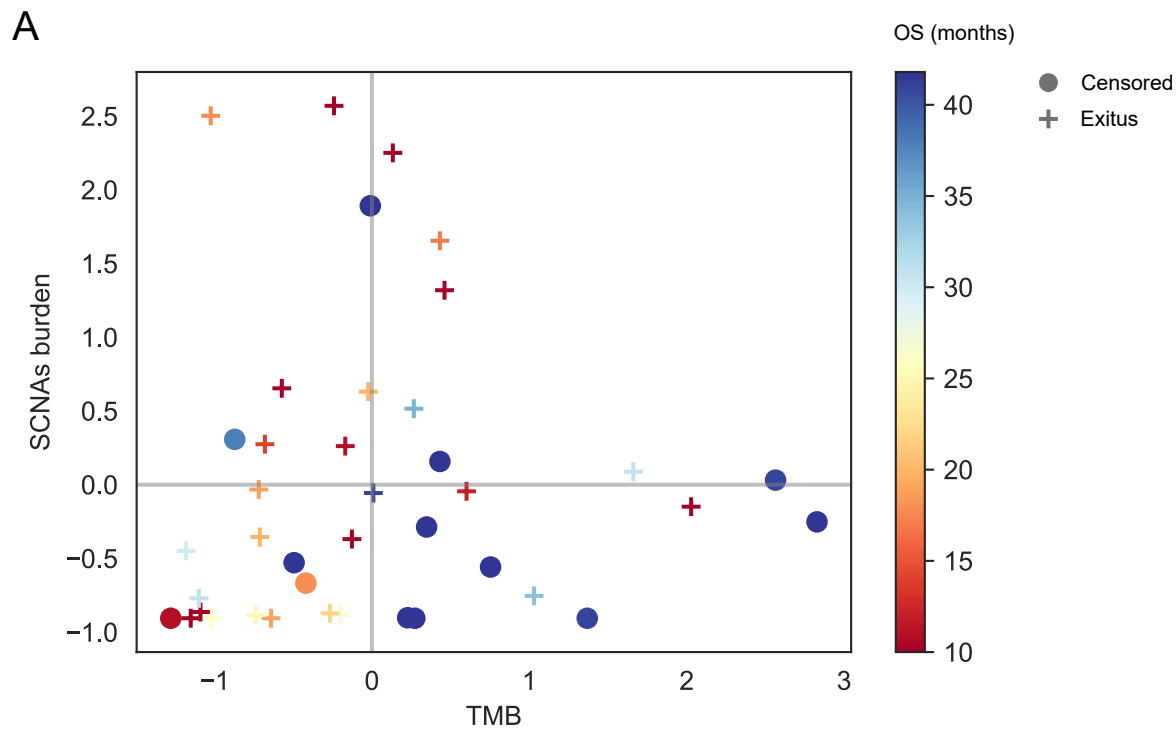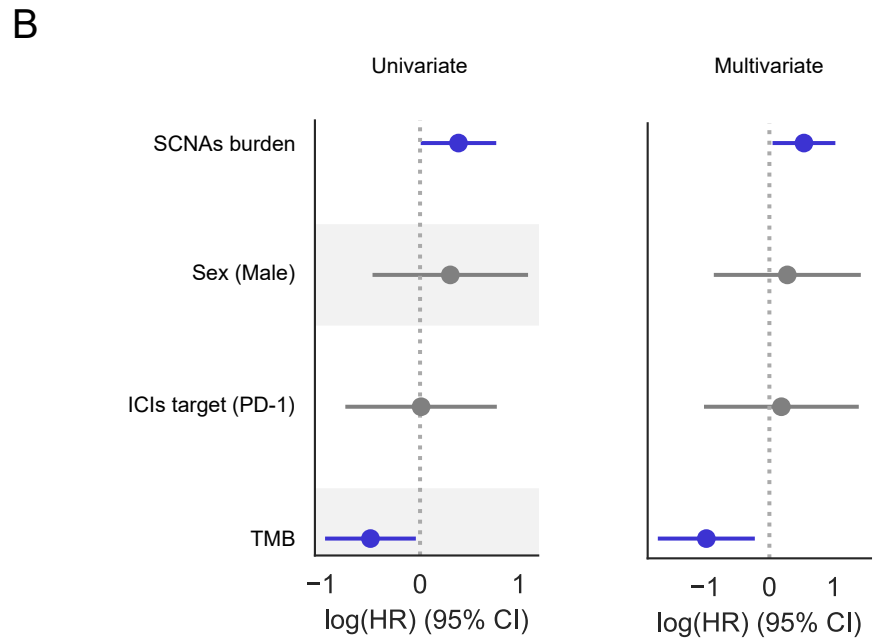

Figure S5

A

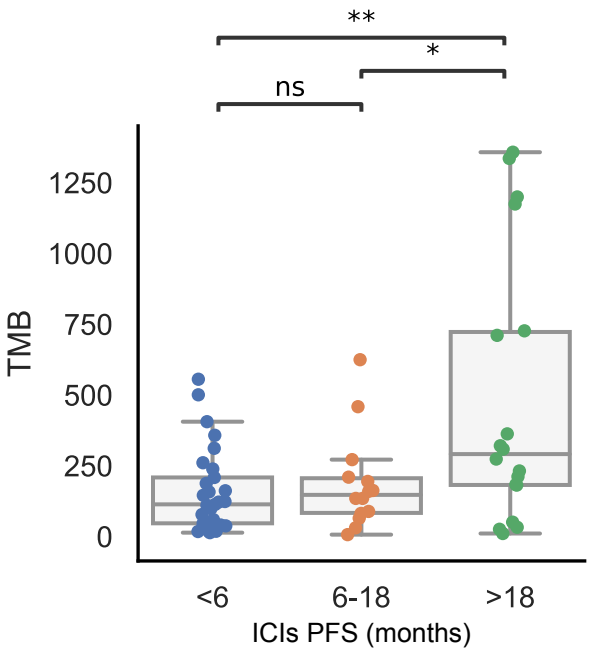

B

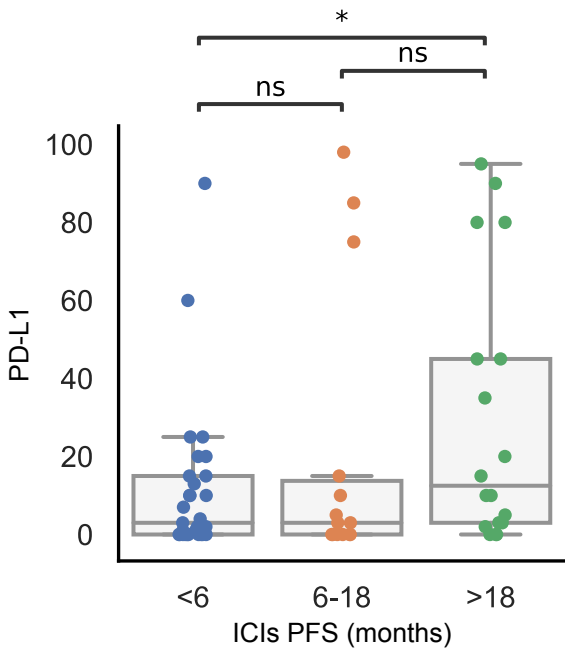

Supplement: MOL2-15-887-s003.pdf [file MOL2-15-887-s003.pdf]
